# Supplementary material
Source: publisher figshare collection journal article supplement (https://karger.figshare.com/ndownloader/files/18018062)
Supplement: Supplementary file 1 [file 18018062]

**Supplementary Table 1. Down-regulated genes in *USP8*-variant corticotrope adenomas**

| **SYMBOL** | **DiffScore** | **DEFINITION** |
| --- | --- | --- |
| *ABCA7* | -13,13 | ATP-binding cassette, sub-family A (ABC1), member 7, mRNA. |
| *ABCA9* | -16,85 | ATP-binding cassette, sub-family A (ABC1), member 9, mRNA. |
| *ACAP3* | -14,88 | ArfGAP with coiled-coil, ankyrin repeat and PH domains 3, mRNA. |
| *ACR* | -13,43 | acrosin, mRNA. |
| *AGAP2* | -13,08 | ArfGAP with GTPase domain, ankyrin repeat and PH domain 2, mRNA. |
| *ALG8* | -13,09 | asparagine-linked glycosylation 8, alpha-1,3-glucosyltransferase homolog (S. cerevisiae), transcript variant 2, mRNA. |
| *ANKRD40* | -15,56 | ankyrin repeat domain 40, mRNA. |
| *ANKRD54* | -13,08 | ankyrin repeat domain 54, mRNA. |
| *AP1G2* | -31,61 | adaptor-related protein complex 1, gamma 2 subunit, mRNA. |
| *ATAD1* | -13,14 | ATPase family, AAA domain containing 1, mRNA. |
| *ATF6B* | -14,79 | activating transcription factor 6 beta, transcript variant 1, mRNA. |
| *AVPR1B* | -13,43 | arginine vasopressin receptor 1B, mRNA. |
| *B3GNT9* | -16,01 | UDP-GlcNAc:betaGal beta-1,3-N-acetylglucosaminyltransferase 9, mRNA. |
| *BOP1* | -20,68 | block of proliferation 1 (BOP1), mRNA. |
| *C14orf153* | -31,61 | chromosome 14 open reading frame 153 (C14orf153), mRNA. |
| *C17orf108* | -21,26 | chromosome 17 open reading frame 108 (C17orf108), mRNA. |
| *C2orf89* | -14,79 | chromosome 2 open reading frame 89 (C2orf89), mRNA. |
| *C4orf18* | -13,61 | chromosome 4 open reading frame 18 (C4orf18), transcript variant 2, mRNA. |
| *C7orf43* | -16,01 | chromosome 7 open reading frame 43 (C7orf43), mRNA. |
| *C8orf42* | -21,41 | chromosome 8 open reading frame 42 (C8orf42), mRNA. |
| *CACNA1C* | -14,80 | calcium channel, voltage-dependent, L type, alpha 1C subunit (CACNA1C), mRNA. |
| *CCDC85B* | -13,19 | coiled-coil domain containing 85B (CCDC85B), mRNA. |
| *CDC2L2* | -13,08 | cell division cycle 2-like 2 (PITSLRE proteins) (CDC2L2), transcript variant 5, mRNA. |
| *CDC42EP5* | -14,61 | CDC42 effector protein (Rho GTPase binding) 5 (CDC42EP5), mRNA. |
| *CFI* | -14,51 | complement factor I (CFI), mRNA. |
| *CHMP7* | -21,65 | CHMP family, member 7 (CHMP7), mRNA. |
| *CTNND1* | -13,09 | catenin (cadherin-associated protein), delta 1 (CTNND1), mRNA. |
| *CYP7B1* | -19,56 | cytochrome P450, family 7, subfamily B, polypeptide 1 (CYP7B1), mRNA. |
| *DERL2* | -15,56 | Der1-like domain family, member 2 (DERL2), mRNA. |
| *DNAJB2* | -15,56 | DnaJ (Hsp40) homolog, subfamily B, member 2 (DNAJB2), transcript variant 2, mRNA. |
| *DSE* | -14,54 | dermatan sulfate epimerase (DSE), transcript variant 1, mRNA. |
| *EDG1* | -14,40 | endothelial differentiation, sphingolipid G-protein-coupled receptor, 1 (EDG1), mRNA. |
| *EIF4G1* | -14,79 | eukaryotic translation initiation factor 4 gamma, 1 (EIF4G1), transcript variant 3, mRNA. |
| *EIF5A* | -16,84 | eukaryotic translation initiation factor 5A (EIF5A), mRNA. |
| *ERGIC1* | -13,51 | endoplasmic reticulum-golgi intermediate compartment 1 (ERGIC1), mRNA. |
| *FAM73B* | -14,40 | family with sequence similarity 73, member B (FAM73B), mRNA. |
| *FASTKD2* | -13,90 | FAST kinase domains 2 (FASTKD2), mRNA. |
| *FTHL3* | -13,08 | ferritin, heavy polypeptide-like 3 (FTHL3), non-coding RNA. |
| *GDAP1L1* | -31,61 | ganglioside-induced differentiation-associated protein 1-like 1 (GDAP1L1), mRNA. |
| *GNA13* | -18,32 | guanine nucleotide binding protein (G protein), alpha 13 (GNA13), mRNA. |
| *GOLGA1* | -21,65 | golgi autoantigen, golgin subfamily a, 1 (GOLGA1), mRNA. |
| *GPS1* | -13,14 | G protein pathway suppressor 1 (GPS1), transcript variant 1, mRNA. |
| *HDAC7A* | -17,30 | histone deacetylase 7A (HDAC7A), transcript variant 2, mRNA. |
| *HM13* | -13,67 | histocompatibility (minor) 13 (HM13), transcript variant 4, mRNA. |
| *HSP90B3P* | -26,30 | heat shock protein 90kDa beta (Grp94), member 3 (pseudogene) (HSP90B3P) |
| *HSPA4* | -31,24 | heat shock 70kDa protein 4 (HSPA4), mRNA. |
| *HUS1* | -13,09 | HUS1 checkpoint homolog (S. pombe) (HUS1), mRNA. |
| *IL11RA* | -18,32 | interleukin 11 receptor, alpha (IL11RA), transcript variant 2, mRNA. |
| *INO80B* | -13,03 | INO80 complex subunit B (INO80B), mRNA. |
| *INTS3* | -22,70 | integrator complex subunit 3 (INTS3), mRNA. |
| *IQSEC2* | -14,61 | IQ motif and Sec7 domain 2 (IQSEC2), transcript variant 2, mRNA. |
| *JPH4* | -14,38 | junctophilin 4 (JPH4), mRNA. |
| *JUP* | -14,23 | junction plakoglobin (JUP), transcript variant 1, mRNA. |
| *KIF13B* | -18,32 | kinesin family member 13B (KIF13B), mRNA. |
| *KLF16* | -13,12 | Kruppel-like factor 16 (KLF16), mRNA. |
| *LAMA4* | -17,30 | laminin, alpha 4 (LAMA4), mRNA. |
| *LCP2* | -13,09 | lymphocyte cytosolic protein 2 (LCP2), mRNA. |
| *LMF2* | -13,09 | lipase maturation factor 2 (LMF2), mRNA. |
| *LMTK3* | -14,61 | lemur tyrosine kinase 3 (LMTK3), mRNA. |
| *LOC100131187* | -13,61 | KAT protein (LOC100131187), mRNA. |
| *LOC399900* | -14,21 | hypothetical gene supported by AK093779 (LOC399900), mRNA. |
| *MAPK12* | -13,34 | mitogen-activated protein kinase 12 (MAPK12), mRNA. |
| *LRIG2* | -13.01 | leucine-rich repeats and immunoglobulin-like domains 2 (LRIG2), mRNA |
| *MAPK8IP2* | -19,27 | mitogen-activated protein kinase 8 interacting protein 2 (MAPK8IP2), mRNA. |
| *MAPK8IP3* | -16,01 | mitogen-activated protein kinase 8 interacting protein 3 (MAPK8IP3), mRNA. |
| *MED22* | -13,61 | mediator complex subunit 22 (MED22), transcript variant c, mRNA. |
| *METTL2B* | -19,94 | methyltransferase like 2B (METTL2B), mRNA. |
| *MIR27B* | -16,98 | microRNA 27b (MIR27B), microRNA. |
| *MIR411* | -14,88 | microRNA 411 (MIR411), microRNA. |
| *MIR645* | -17,55 | microRNA 645 (MIR645), microRNA. |
| *MSL3* | -14,79 | male-specific lethal 3 homolog (Drosophila) (MSL3), transcript variant 4, mRNA. |
| *NDUFA4L2* | -35,49 | NADH dehydrogenase (ubiquinone) 1 alpha subcomplex, 4-like 2 (NDUFA4L2), mRNA. |
| *NETO2* | -14,79 | neuropilin (NRP) and tolloid (TLL)-like 2 (NETO2), mRNA. |
| *NIPA2* | -13,78 | non imprinted in Prader-Willi/Angelman syndrome 2 (NIPA2), mRNA. |
| *NLGN4X* | -13,13 | neuroligin 4, X-linked (NLGN4X), transcript variant 2, mRNA. |
| *NOD1* | -13,09 | nucleotide-binding oligomerization domain containing 1 (NOD1), mRNA. |
| *NOL6* | -14,38 | nucleolar protein family 6 (RNA-associated) (NOL6), transcript variant alpha, mRNA. |
| *NPSR1* | -26,16 | neuropeptide S receptor 1 (NPSR1), transcript variant 2, mRNA. |
| *NUDT6* | -13,04 | nudix (nucleoside diphosphate linked moiety X)-type motif 6 (NUDT6), mRNA. |
| *PAQR6* | -16,31 | progestin and adipoQ receptor family member VI (PAQR6), transcript variant 1, mRNA. |
| *PDLIM3* | -17,30 | PDZ and LIM domain 3 (PDLIM3), mRNA. |
| *PEX14* | -16,11 | peroxisomal biogenesis factor 14 (PEX14), mRNA. |
| *PGS1* | -19,49 | phosphatidylglycerophosphate synthase 1 (PGS1), mRNA. |
| *PHKA1* | -14,50 | phosphorylase kinase, alpha 1 (muscle) (PHKA1), mRNA. |
| *PITX2* | -13,08 | paired-like homeodomain 2 (PITX2), transcript variant 3, mRNA. |
| *PKD1* | -13,38 | polycystic kidney disease 1 (autosomal dominant) (PKD1), transcript variant 1, mRNA. |
| *PLEKHB2* | -13,09 | pleckstrin homology domain containing, family B (evectins) member 2 (PLEKHB2), mRNA. |
| *PPP1R13L* | -13,38 | protein phosphatase 1, regulatory (inhibitor) subunit 13 like (PPP1R13L), mRNA. |
| *PRDM7* | -16,85 | PR domain containing 7 (PRDM7), transcript variant 1, mRNA. |
| *PUS1* | -15,56 | pseudouridylate synthase 1 (PUS1), transcript variant 1, mRNA. |
| *RAB4B* | -23,61 | RAB4B, member RAS oncogene family (RAB4B), mRNA. |
| *RAPH1* | -13,51 | Ras association (RalGDS/AF-6) and pleckstrin homology domains 1 (RAPH1), mRNA. |
| *RBM23* | -13,38 | RNA binding motif protein 23 (RBM23), transcript variant 3, mRNA. |
| *RGPD6* | -13,09 | RANBP2-like and GRIP domain containing 6 (RGPD6), transcript variant 2, mRNA. |
| *RPL6* | -15,21 | ribosomal protein L6 (RPL6), transcript variant 1, mRNA. |
| *SCAMP2* | -13,09 | secretory carrier membrane protein 2 (SCAMP2), mRNA. |
| *SEMA4B* | -21,65 | sema domain, immunoglobulin domain (Ig), transmembrane domain (TM) and short cytoplasmic domain, (semaphorin) 4B (SEMA4B), transcript variant 2, mRNA. |
| *SERPINH1* | -13,09 | serpin peptidase inhibitor, clade H (heat shock protein 47), member 1, (collagen binding protein 1) (SERPINH1), mRNA. |
| *SETD8* | -14,55 | SET domain containing (lysine methyltransferase) 8 (SETD8), mRNA. |
| *SH3KBP1* | -13,39 | SH3-domain kinase binding protein 1 (SH3KBP1), transcript variant 2, mRNA. |
| *SHC1* | -14,47 | SHC (Src homology 2 domain containing) transforming protein 1 (SHC1), mRNA. |
| *SLC30A8* | -15,17 | solute carrier family 30 (zinc transporter), member 8 (SLC30A8), mRNA. |
| *SLC9A3R2* | -19,49 | solute carrier family 9 (sodium/hydrogen exchanger), member 3 regulator 2 (SLC9A3R2), mRNA. |
| *SMAD9* | -17,06 | SMAD family member 9 (SMAD9), mRNA. |
| *SMYD5* | -17,22 | SMYD family member 5 (SMYD5), mRNA. |
| *SNORA39* | -14,55 | small nucleolar RNA, H/ACA box 39 (SNORA39), small nucleolar RNA. |
| *SNORD125* | -15,21 | small nucleolar RNA, C/D box 125 (SNORD125), small nucleolar RNA. |
| *SNORD22* | -14,38 | small nucleolar RNA, C/D box 22 (SNORD22), small nucleolar RNA. |
| *SNORD36B* | -32,53 | small nucleolar RNA, C/D box 36B (SNORD36B), small nucleolar RNA. |
| *SNORD54* | -15,56 | small nucleolar RNA, C/D box 54 (SNORD54), small nuclear RNA. |
| *SNORD6* | -28,22 | small nucleolar RNA, C/D box 6 (SNORD6), small nucleolar RNA. |
| *SPC25* | -30,54 | NDC80 kinetochore complex component, homolog (S. cerevisiae) (SPC25), mRNA. |
| *SREBF1* | -17,16 | sterol regulatory element binding transcription factor 1 (SREBF1), mRNA. |
| *STAB1* | -13,13 | stabilin 1 (STAB1), mRNA. |
| *STAT3* | -13,39 | signal transducer and activator of transcription 3 (acute-phase response factor) (STAT3), transcript variant 1, mRNA. |
| *SULT1A3* | -18,07 | sulfotransferase family, cytosolic, 1A, phenol-preferring, member 3 (SULT1A3), transcript variant 2, mRNA. |
| *SYT5* | -13,43 | synaptotagmin V (SYT5), mRNA. |
| *TAS1R1* | -13,09 | taste receptor, type 1, member 1 (TAS1R1), transcript variant 1, mRNA. |
| *THAP1* | -13,58 | THAP domain containing, apoptosis associated protein 1 (THAP1), mRNA. |
| *TJP2* | -21,05 | tight junction protein 2 (zona occludens 2) (TJP2), transcript variant 2, mRNA. |
| *TMED9* | -13,38 | transmembrane p24 protein transport domain containing 9 (TMED9), mRNA. |
| *TMEM198* | -13,38 | transmembrane protein 198 (TMEM198), mRNA. |
| *TMEM45A* | -13,64 | transmembrane protein 45A (TMEM45A), mRNA. |
| *TMSL3* | -18,07 | thymosin-like 3 (TMSL3), mRNA. |
| *TNFRSF6B* | -13,10 | tumor necrosis factor receptor superfamily, member 6b, decoy (TNFRSF6B), mRNA. |
| *TNRC6A* | -13,09 | trinucleotide repeat containing 6A (TNRC6A), mRNA. |
| *TP53I11* | -16,11 | tumor protein p53 inducible protein 11 (TP53I11), mRNA a.k.a. PLG11 |
| *TP53INP2* | -18,14 | tumor protein p53 inducible nuclear protein 2 (TP53INP2), mRNA. |
| *TRAFD1* | -18,26 | TRAF-type zinc finger domain containing 1 (TRAFD1), mRNA. |
| *TRIM13* | -13,67 | tripartite motif-containing 13 (TRIM13), transcript variant 3, mRNA. |
| *TSPY1* | -43,36 | testis specific protein Y-encoded 1 (TSPY1), mRNA. |
| *TUSC2* | -16,80 | tumor suppressor candidate 2 (TUSC2), mRNA. |
| *TYW1* | -15,56 | tRNA-yW synthesizing protein 1 homolog (S. cerevisiae) (TYW1), mRNA. |
| *UNC13A* | -17,22 | unc-13 homolog A (C. elegans) (UNC13A), mRNA. |
| *UNC5B* | -14,49 | unc-5 homolog B (C. elegans) (UNC5B), mRNA. |
| *UQCR* | -16,25 | ubiquinol-cytochrome c reductase, 6.4kDa subunit (UQCR), mRNA. |
| *UQCRQ* | -23,61 | ubiquinol-cytochrome c reductase, complex III subunit VII, 9.5kDa (UQCRQ), nuclear gene encoding mitochondrial protein, mRNA. |
| *VTRNA1-1* | -17,55 | vault RNA 1-1 (VTRNA1-1), non-coding RNA. |
| *VWA1* | -13,09 | von Willebrand factor A domain containing 1 (VWA1), transcript variant 1, mRNA. |
| *WNT5A* | -13,09 | wingless-type MMTV integration site family, member 5A (WNT5A), mRNA. |
| *ZMAT1* | -18,07 | zinc finger, matrin type 1 (ZMAT1), transcript variant 3, mRNA. |
| *ZNF155* | -13,08 | zinc finger protein 155 (ZNF155), transcript variant 1, mRNA. |
| *ZNF554* | -14,59 | zinc finger protein 554 (ZNF554), mRNA. |
| *ZNF580* | -16,35 | zinc finger protein 580 (ZNF580), transcript variant 1, mRNA. |
| *ZNF75D* | -13,77 | zinc finger protein 75D (ZNF75D), mRNA. |
